# Supplementary material for: Layer-by-layer deposition of magnetic microgel films on plastic surfaces for the preparation of magnetic resonance visibility enhancing coatings
Source: Royal Society of Chemistry journal article supplement (doi:10.1039/b917834a), 2009-11-20

### Supplementary Information

Fig. S1 Photograph of PP strips. Left: a naked PP strip. Right: a PP strip deposited with a (PAH-D/PSS)\*1-(Fe<sub>3</sub>O<sub>4</sub>@PAH-D/PSS)\*10 film.

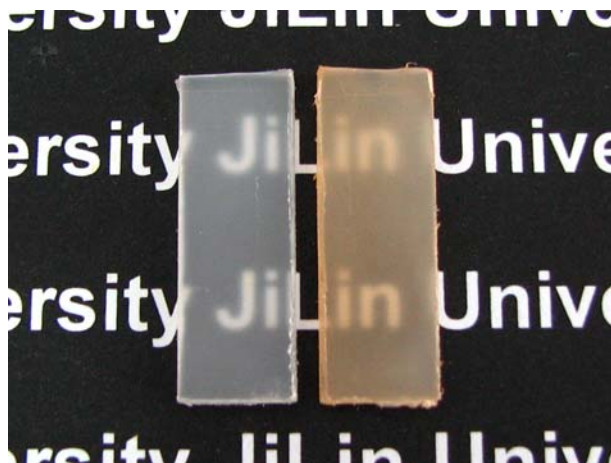

Fig. S2 Photograph of PVC catheters. Left: a naked PVC catheter. Right: a PVC catheter deposited with a (PAH-D/PSS)\*1-(Fe<sub>3</sub>O<sub>4</sub>@PAH-D/PSS)\*10 film.

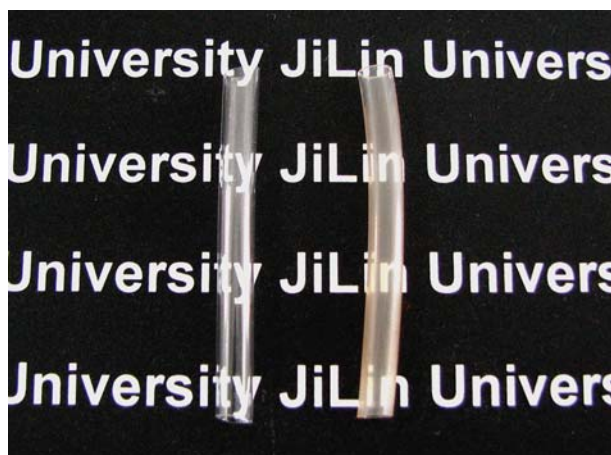

Supplement: b917834a.pdf [file b917834a.pdf]
